# Supplementary material for: Diverse Begomoviruses Evolutionarily Hijack Plant Terpenoid-Based Defense to Promote Whitefly Performance
Source: MDPI journal article supplement (doi:10.3390/cells12010149), 2022-12-30
Supplement: s1 [file s1]

## SUPPORTING INFORMATION

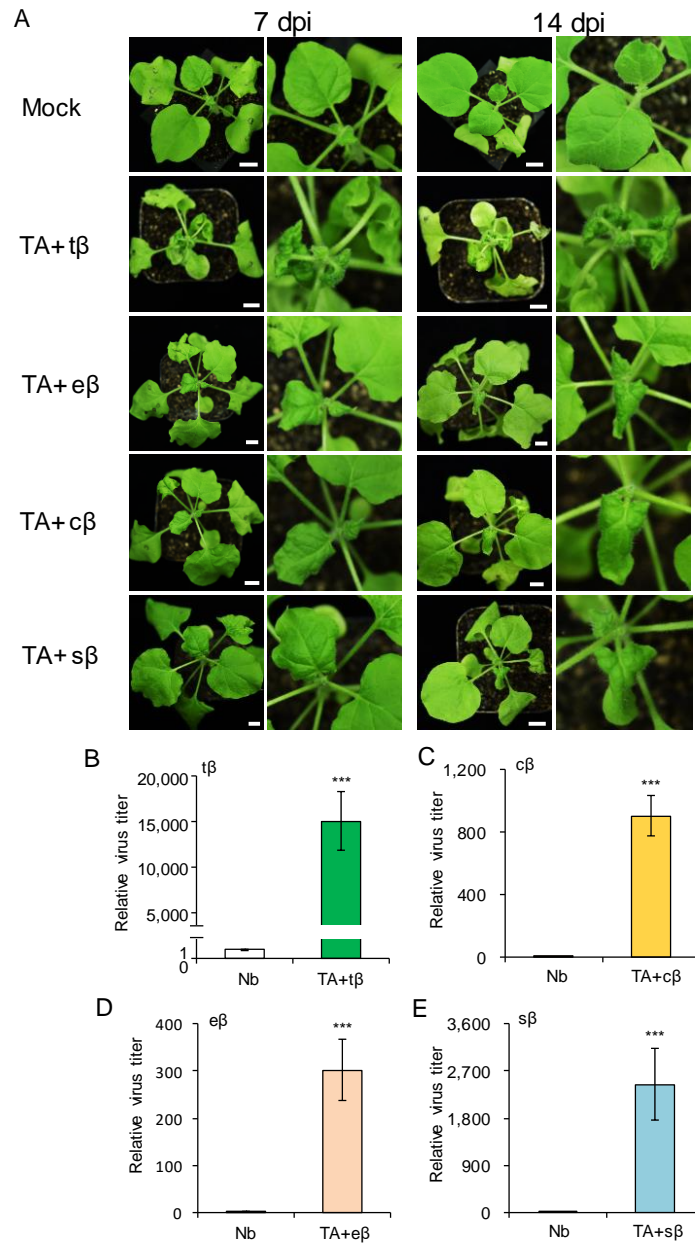

**Figure S1.** The betasatellites are required for begomovirus symptoms. (A) Symptoms of *N. benthamiana* (Nb) plants inoculated with TYLCCNV/TYLCCNB complex (TA+t $\beta$ ), TYLCCNV/EPYVB complex (TA+e $\beta$ ), TYLCCNV/CLCuMuB complex (TA+c $\beta$ ) or TYLCCNV/SiYVB complex (TA+s $\beta$ ) at 7dpi and 14 dpi. Nb inoculated with *Agrobacterium* was as mock (Nb, mock). Scale bars = 1 cm. (B-E) Viral DNA accumulation was quantified by RT-PCR in healthy Nb plants, and Nb plants infected by TA+t $\beta$  (B), TA+c $\beta$  (C), or TA+e $\beta$  (D), or TA+s $\beta$  (E). Bars represent means  $\pm$  SD (n=4) (\*\*\*,  $P < 0.001$ ; Student's  $t$ -tests).

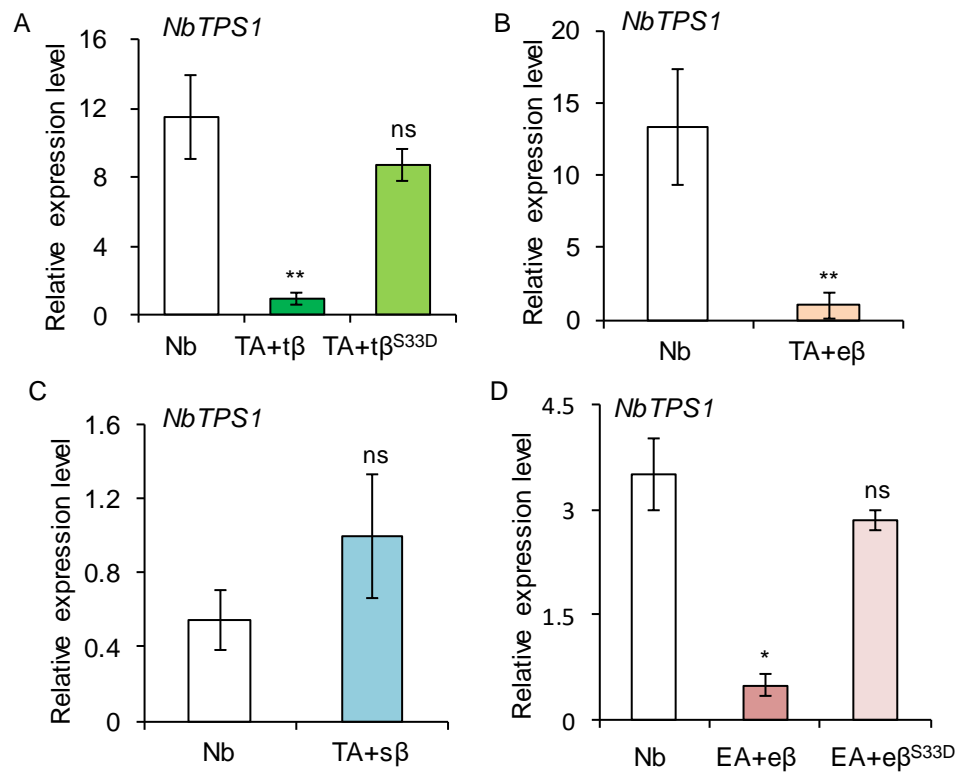

**Figure S2.** Begomovirus-betasatellite complex infection reduces *NbTPS1* expression. (A-D) Relative expression level of *NbTPS1* in healthy Nb plants, and Nb plants infected by TA+tβ and TA+tβ<sup>S33D</sup> (A), TA+eβ (B), TA+sβ (C) and EA+eβ and EA+eβ<sup>S33D</sup> (D). Bars represent means ± SD (n=4) (ns, no significant differences; \**P* < 0.05, \*\**P* < 0.01; Student's *t*-tests).

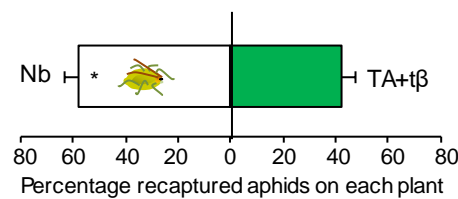

**Figure S3.** The TYLCCNV/TYLCCNB complex reduces plant attraction to non-vector aphids. The preference of non-vector aphids on uninfected *N. benthamiana* (Nb, mock) and plants infected by TA+tβ complex. Bars represent means + SD (n=6) (\**P* < 0.05; Wilcoxon matched pairs test).

|                |                                                                       |
|----------------|-----------------------------------------------------------------------|
|                |                                                                       |
| <b>TYLCCNB</b> | T2, Y5, <b>S33</b> , T34, T78, Y110, T114, S116                       |
| ZiLCuB         | T2, Y5, S6, T21, T22, S26, <b>S33</b> , T36, Y44, S65, Y74, S77, Y110 |
| ToLCBaB        | T2, Y5, S24, T32, <b>S33</b> , T34, S36, T77, T88, S104               |
| TYLCVNB        | T2, <b>S33</b> , T34, S51, S77, T78, T90                              |
| AIYVB          | T4, <b>S33</b> , S40, S61, T78                                        |
| <b>CLCuMuB</b> | S4, 6T, 8T, 14T, <b>S33</b> , T34, S36, S38, Y50, Y110, T117          |
| MaYVYnB        | S4, T14, <b>S33</b> , T34, S36, T38, T49, Y50, Y110, T117             |
| CLCuBaB        | T6, T7, T14, <b>S33</b> , T34, S36, S37, Y50, Y110, T117              |
| <b>EpYVB</b>   | Y5, T22, <b>S33</b> , Y40, Y48, T60, T88                              |
| <b>SiYVB</b>   | T4, T14, S20, Y40, T43, T60, T67, T72, Y76, T81, T104, S109, T115     |

**Figure S4.** The potential phosphorylation sites of betasatellite-encoded  $\beta$ C1 proteins. Prediction of potential phosphorylation sites in some betasatellite-encoded  $\beta$ C1 proteins sequence using NetPhos 3.1.



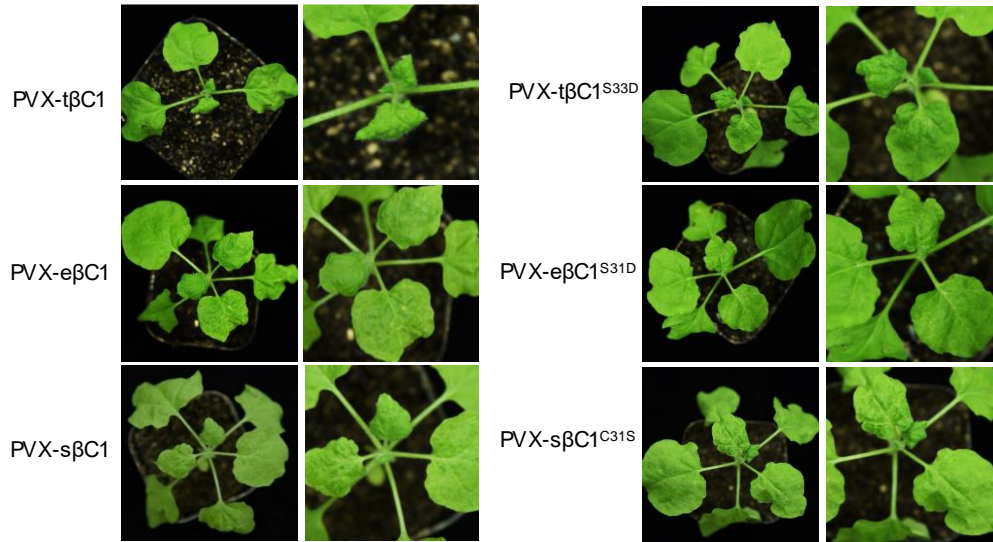

**Figure S6.** Symptoms of *N. benthamiana* inoculated with *Agrobacteria* carrying individual recombinant PVX vectors at 10 dpi. *N. benthamiana* leaves were inoculated with recombinant Potato virus X (PVX) vectors PVX-t $\beta$ C1, PVX-t $\beta$ C1<sup>S33D</sup>, PVX-e $\beta$ C1, PVX-e $\beta$ C1<sup>S31D</sup>, PVX-s $\beta$ C1, PVX-s $\beta$ C1<sup>C31S</sup> via agroinfiltration.

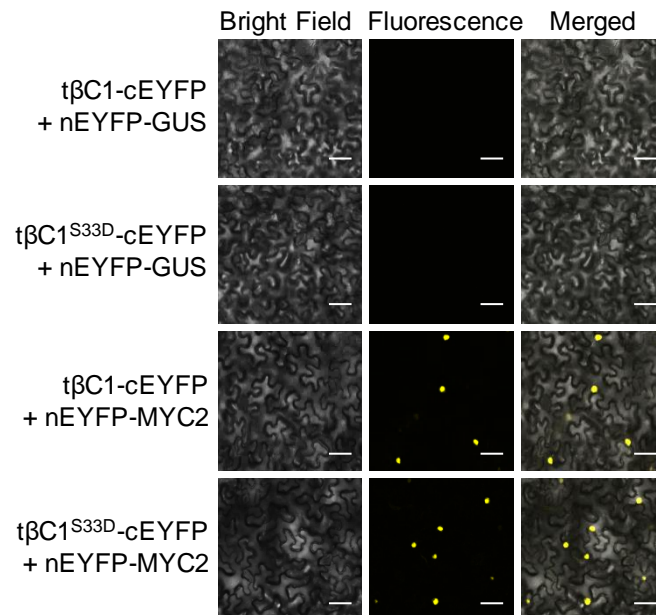

**Figure S7.** The phosphorylation mimic mutant  $\beta$ C1<sup>S33D</sup> does not influence the interaction of  $\beta$ C1 with MYC2. BiFC analysis shows the interaction between wild-type t $\beta$ C1 and MYC2 or the phosphorylation mimics mutant t $\beta$ C1<sup>S33D</sup> and MYC2. The nEYFP-GUS was used as a negative control. Scale bars = 50  $\mu$ m.

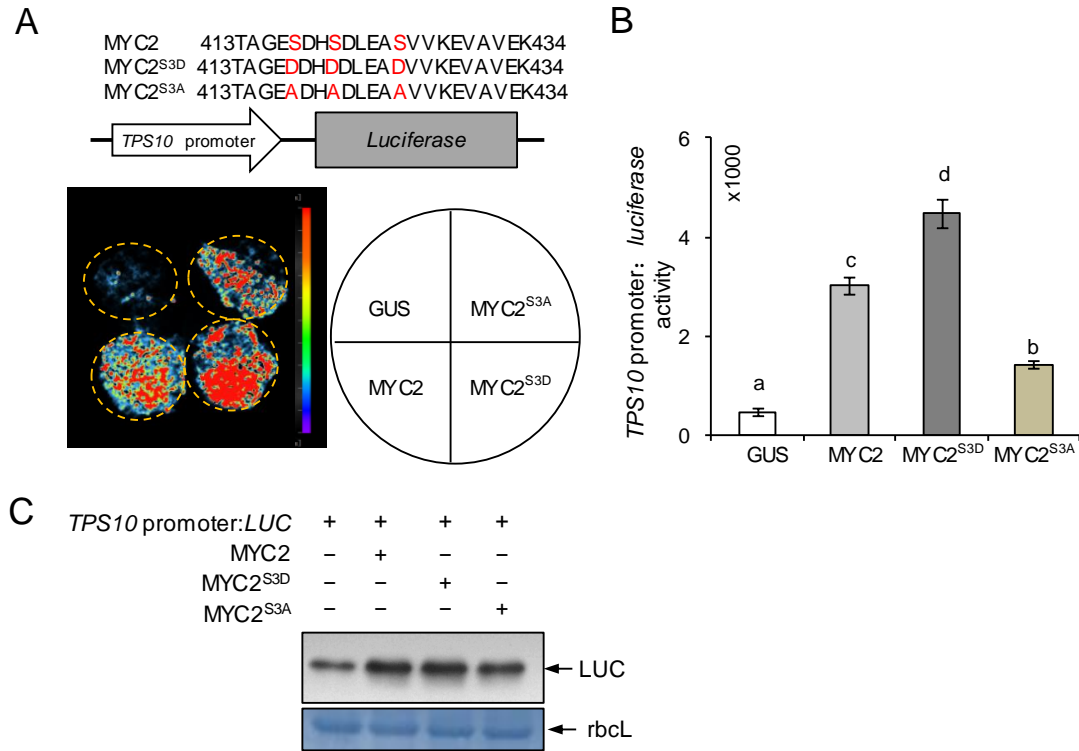

**Figure S8.** The phosphorylation levels of MYC2 influence its transcription activation. (A) Luciferase imaging of phosphorylation of MYC2 influencing its transcriptional activity on *TPS10* promoter in *N. benthamiana*. *N. benthamiana* leaves infiltrated *TPS10* promoter: *LUC* with 35S: *MYC2*, low phosphorylation mutant 35S: *MYC2*<sup>S3A</sup>, phosphorylation mimic mutant 35S: *MYC2*<sup>S3D</sup> or 35S: *GUS* were subjected to luciferase complementation imaging assay. (B) Quantitative luminescence of *TPS10* promoter luciferase activity in *N. benthamiana*. *N. benthamiana* leaves infiltrated with indicated constructs were sliced into strips, and relative luminescence was determined by a microplate luminometer. Values are mean  $\pm$  SEM (n = 8). Lowercase letters indicate significant differences among columns according to one-way ANOVA followed by Duncan's multiple range test ( $P < 0.05$ ). (C) Western blot assay of LUC accumulation in agroinfiltrated leaf patches shown in figure B. Stained membrane bands of the large subunit of Rubisco (*rbcL*) were used as a loading control.

| Name of species:                               |           | phosphorylation sites | location                        | Whitefly vector |
|------------------------------------------------|-----------|-----------------------|---------------------------------|-----------------|
| Cardiospermum yellow leaf curl betasatellite   | CaYLCuB   | 33D                   |                                 |                 |
| Sida yellow vein Madurai betasatellite         | SiYVMaB   | 33L                   | Indian (south west Asia)        |                 |
| <i>Ageratum leaf curl Buea betasatellite</i>   | ALCuBB    | 33A                   | Cameroon (west Africa)          |                 |
| Ageratum leaf curl Cameroon betasatellite      | ALCuCMB   | 33A                   | Cameroon (west Africa)          |                 |
| Momordica yellow mosaic betasatellite          | MamYMB    | 33A                   | Cameroon and Togo (west Africa) |                 |
| Tomato leaf curl Togo betasatellite            | ToLCuTGB  | 33A                   | Togo (west Africa)              |                 |
| Tomato leaf curl Ghana betasatellite1          | ToLCuGHB1 | 33N                   | Ghana (west Africa)             |                 |
| Tomato leaf curl Ghana betasatellite2          | ToLCuGHB2 | 33A                   | Ghana (west Africa)             |                 |
| Cotton leaf curl Burkina Faso betasatellite    | CLCuBFB   | 33A                   | Burkina Faso (west Africa)      |                 |
| Cotton leaf curl Gezira betasatellite          | CLCuGeB   | 33A                   | Sudan (west Africa)             |                 |
| Okra leaf curl Oman betasatellite              | OLCuOMB   | 33A                   | Oman (south west Asia)          |                 |
| Tomato leaf curl Yemen betasatellite           | ToLCYEB   | 33A                   | Yemen (south west Asia)         |                 |
| Tomato leaf curl Laguna betasatellite          | ToLCLaB   | 33L                   | Philippines (south west Asia)   |                 |
| Chilli leaf curl Sri Lanka betasatellite       | ChLCuSLB  | 33A                   | Sri Lanka                       |                 |
| Tomato leaf curl Philippine betasatellite      | ToLCPHB   | 33L                   | Philippine (south west Asia)    |                 |
| Vernonia yellow vein Fujian betasatellite      | VYVFuB    | 33N                   | China                           |                 |
| Vernonia yellow vein betasatellite             | VYVB      | 33R                   | Indian (south west Asia)        |                 |
| Siegesbeckia yellow vein betasatellite         | SiYVB     | 33C                   | China                           |                 |
| Siegesbeckia yellow vein betasatellite 2       | SiYVB2    | 33C                   | China                           |                 |
| Lindernia anagallis yellow vein betasatellite  | LaYVB     | 33Y                   | Vietnam (south west Asia)       |                 |
| Siegesbeckia yellow vein Guangxi betasatellite | SiYVGxB   | 33C                   | China                           |                 |

**Figure S9.** Variation analysis and location of betasatellite species which lost the conserved serine-33 site in  $\beta$ C1 proteins from the three subgroups. Location information is collected from NCBI genebank Description.



**Table S1.** Primers sequences used in this investigation.

| Primers names                    | Primer Sequence (5'-3')                   | Purpose  |
|----------------------------------|-------------------------------------------|----------|
| PUC19-EPYVV- $\beta$ C1-Flag-F   | CGGGGGACGAGCTCGGTACC ATGACGATCACATACAAT   | Cloning  |
| PUC19-EPYVV- $\beta$ C1-Flag-R   | TGGTCTTTGTAGTCTTCGAA TACTGCGTATTTACATCG   | Cloning  |
| PUC19-SieYVV- $\beta$ C1-Flag-F  | CGGGGGACGAGCTCGGTACC ATGCACAAGATGACTATCAC | Cloning  |
| PUC19-SieYVV- $\beta$ C1-Flag-R  | TGGTCTTTGTAGTCTTCGAA AAGTGTACATCTAGATCT   | Cloning  |
| PUC19-CLCuMuV- $\beta$ C1-Flag-F | CGGGGGACGAGCTCGGTACC ATGACGAGGAGCAGAACA   | Cloning  |
| PUC19-CLCuMuV- $\beta$ C1-Flag-R | TGGTCTTTGTAGTCTTCGAA AACGGTGAACCTTCTTATT  | Cloning  |
| PUC19-TYLCCNV- $\beta$ C1-Flag-F | CGGGGGACGAGCTCGGTACC ATGACTATCAAATACAAC   | Cloning  |
| PUC19-TYLCCNV- $\beta$ C1-Flag-R | TGGTCTTTGTAGTCTTCGAA TACATCTGAATTTGTAAA   | Cloning  |
| TYLCCNV- $\beta$ C1_Fw(Cal1)-PVX | CAAG ATCGAT ATGACTATCAAATACAAC            | Cloning  |
| TYLCCNV- $\beta$ C1_Rv(Sal1)-PVX | CAAG GTCGAC TACATCTGAATTTGTAAA            | Cloning  |
| EPYVV- $\beta$ C1_Fw(Cal1)-PVX   | CAAG ATCGAT ATGACGATCACATACAAT            | Cloning  |
| EPYVV- $\beta$ C1_Rv(Sal1)-PVX   | CAAG GTCGAC TACTGCGTATTTACATCG            | Cloning  |
| SieYVV- $\beta$ C1_Fw(Cal1)-PVX  | CAAG ATCGAT ATGCACAAGATGACTATCAC          | Cloning  |
| SieYVV- $\beta$ C1_Rv(Sal1)-PVX  | CAAG GTCGAC AAGTGTACATCTAGATCT            | Cloning  |
| TYLCCNV- $\beta$ C1_Fw(Cal1)-PVX | CAAG ATCGAT TGAATATCAAATACAACA            | Cloning  |
| TYLCCNV- $\beta$ C1_Rv(Sal1)-PVX | CAAG GTCGAC TCATACATCTGAATTTGT            | Cloning  |
| CLCuMuV- $\beta$ C1_Fw(Cal1)-PVX | CAAG ATCGAT ATGACGAGGAGCAGAACA            | Cloning  |
| CaLCuMV- $\beta$ C1_Rv(Not1)-PVX | CAAG GCGGCCGC AACGGTGAACCTTCTTATT         | Cloning  |
| SieYVB (C33S) -F                 | ATTTAAGCATGTTATCAACAAATGAACCAGTA          | mutation |
| SieYVB (C33S) -R                 | TACTGGTTCATTTGTTGATAACATGCTTAAAT          | mutation |
| EpYVB (S33D) -F                  | GTCAAGGTCTTCGACACCAATCAACCA               | mutation |
| EpYVB (S33D) -R                  | TGGTTGATTGGTGTGCGAAGACCTTGAC              | mutation |
| QRT-TYLCCNV ( $\beta$ C1) -F     | ATCCCACCATTCGACTTCAA                      | RT-qPCR  |
| QRT-TYLCCNV ( $\beta$ C1) -R     | TTCTACTGGGGCTTCTTCCA                      | RT-qPCR  |
| QRT-CLCuMuV ( $\beta$ C1) -F     | ATGACGAGGAGCAGAACA                        | RT-qPCR  |
| QRT-CLCuMuV ( $\beta$ C1) -R     | AACGGTGAACCTTCTTATT                       | RT-qPCR  |
| QRT-SieYVV ( $\beta$ C1) -F      | AGCATGTTATGCACAAATG                       | RT-qPCR  |
| QRT-SieYVV ( $\beta$ C1) -R      | GCTGTCAAGTAGTTCTTCCTT                     | RT-qPCR  |



|                                  |                                |         |
|----------------------------------|--------------------------------|---------|
| QRT-EpYVV ( $\beta$ C1) -F       | CATACAATAACGGATGGGG            | RT-qPCR |
| QRT-EpYVV ( $\beta$ C1) -R       | CATCTATGGTGTCCAGCA             | RT-qPCR |
| Nb -TPS1TPS1-F                   | TTAAAACGAACAAAAACAATACCCTCAT   | RT-qPCR |
| Nb -TPS1TPS1-R                   | CTCTTGAGCATACATTTGTGCAACC      | RT-qPCR |
| Nb -EF1 $\alpha$ EF1 $\alpha$ -F | TGGTGTCCCTCAAGCCTGGTATGGTTG    | RT-qPCR |
| Nb -EF1 $\alpha$ EF1 $\alpha$ -R | ACGCTTGAGATCCTTAACCGCAACATTCTT | RT-qPCR |

**Table S2.** Betasatellite accession numbers from ICTV Report

| Species name                                                | Virus acronym           | Acc. No. |
|-------------------------------------------------------------|-------------------------|----------|
| <i>Honeysuckle yellow vein mosaic betasatellite</i>         | HYVMB-[JR-Hy-04]        | AB182263 |
| <i>Tobacco leaf curl Japan betasatellite</i>                | TbLCJRB-[JR-Miy-05]     | AB236324 |
| <i>Honeysuckle yellow vein mosaic Ibaraki betasatellite</i> | HYVMlbB                 | AB287442 |
| <i>Honeysuckle yellow vein mosaic Nara betasatellite</i>    | HYVMNaB                 | AB287443 |
| <i>Tomato yellow dwarf betasatellite</i>                    | ToYDB                   | AB294512 |
| <i>Eupatorium yellow vein mosaic betasatellite</i>          | EpYVV-[JR-Suya-03]      | AB300464 |
| <i>Tomato leaf curl Laguna betasatellite</i>                | ToLCLaB-[PH-Lag2-06]    | AB307732 |
| <i>Tomato leaf curl Philippine betasatellite</i>            | ToLCPHB-[PH-Lag1-06]    | AB308071 |
| <i>Ageratum yellow vein betasatellite</i>                   | AYVB-[SG-95]            | AJ252072 |
| <i>Cotton leaf curl Multan betasatellite</i>                | CLCuMuB-[PK-Mul-U89-97] | AJ298903 |
| <i>Bhendi yellow vein mosaic betasatellite</i>              | BYVB-[IN-Mut-00]        | AJ308425 |
| <i>Ageratum yellow leaf curl betasatellite</i>              | AYLCB-[PK-Fai4-00]      | AJ316026 |
| <i>Chili leaf curl betasatellite</i>                        | ChLCuB-[PK-MC-97]       | AJ316032 |
| <i>Tomato leaf curl betasatellite</i>                       | ToLCB-[PK-RYK-97]       | AJ316036 |
| <i>Honeysuckle yellow vein betasatellite</i>                | HYVB-[UK-Nor1-99]       | AJ316040 |
| <i>Tomato yellow leaf curl China betasatellite</i>          | TYLCCNB-[CN-Yn45-01]    | AJ420313 |
| <i>Tobacco curly shoot betasatellite</i>                    | TobCSB-[CN-Yn35-01]     | AJ421484 |
| <i>Eupatorium yellow vein betasatellite</i>                 | EpYVB-[JR-MNS2-00]      | AJ438938 |
| <i>Tomato leaf curl Bangladesh betasatellite</i>            | ToLCBDB-[BD-Gaz-01]     | AJ542489 |
| <i>Tomato leaf curl Laos betasatellite</i>                  | ToLCLAB-[LA-Sav-01]     | AJ542491 |
| <i>Tomato leaf curl Nepal betasatellite</i>                 | ToLCNPB-[NP-Jhapa]      | AJ542492 |
| <i>Tomato leaf curl Sri Lanka betasatellite</i>             | ToLCSLB-[SL]            | AJ542493 |
| <i>Ageratum yellow vein Sri Lanka betasatellite</i>         | AYVSLB-[SL-Ag-03]       | AJ542498 |
| <i>Zinnia leaf curl betasatellite</i>                       | ZiLCuB                  | AJ542499 |
| <i>Tomato yellow leaf curl Thailand betasatellite</i>       | TYLCTHB-[CN-Yn72-02]    | AJ566746 |
| <i>Tomato leaf curl China betasatellite</i>                 | ToLCCNB-[CN-Gx14-02]    | AJ704609 |
| <i>Malvastrum yellow vein Yunnan betasatellite 1</i>        | MaYVYnB1                | AJ786712 |
| <i>Sida yellow mosaic betasatellite</i>                     | SiYMB                   | AJ810093 |
| <i>Ludwigia yellow vein betasatellite</i>                   | LuYMB                   | AJ965541 |

|                                                       |                             |          |
|-------------------------------------------------------|-----------------------------|----------|
| <i>Tomato leaf curl Joydebpur betasatellite</i>       | ToLCJoB-[BD-Gaz-05]         | AJ966244 |
| <i>Sida yellow vein Madurai betasatellite</i>         | SiYVMaB                     | AJ967003 |
| <i>Ageratum yellow vein China betasatellite</i>       | AYVCNB                      | AJ971257 |
| <i>Malvastrum yellow vein betasatellite</i>           | MaYVB                       | AJ971459 |
| <i>Sida leaf curl betasatellite</i>                   | SiLCuB                      | AM050732 |
| <i>Malvastrum leaf curl betasatellite</i>             | MaLCuB-[CN-Gx87-04]         | AM072289 |
| <i>Siegesbeckia yellow vein Guangxi betasatellite</i> | SiYVGxB                     | AM238695 |
| <i>Tobacco leaf curl betasatellite</i>                | TobLCuB-[PK-Lah-04]         | AM260465 |
| <i>Croton yellow vein mosaic betasatellite</i>        | CroYVMB-[PK-Pun-06]         | AM410551 |
| <i>Cardiospermum yellow leaf curl betasatellite</i>   | CaYLCuB-[SL-04]             | AM933578 |
| <i>Papaya leaf curl betasatellite</i>                 | PaLCuB-[IN-ND-03]           | AY244706 |
| <i>Tomato leaf curl Bangalore betasatellite</i>       | ToLCBaB-[IN-Ban-03]         | AY428768 |
| <i>Cotton leaf curl Bangalore betasatellite 1</i>     | CLCuBaB1                    | AY705381 |
| <i>Ludwigia leaf distortion betasatellite 1</i>       | LuLDB1                      | AY728262 |
| <i>Tomato leaf curl Pune betasatellite</i>            | ToLCuPuB                    | AY754815 |
| <i>Sida yellow vein Vietnam betasatellite 1</i>       | SiYVVNB1                    | DQ641712 |
| <i>Erectites yellow mosaic betasatellite</i>          | ErYMB                       | DQ641713 |
| <i>Tomato yellow leaf curl Vietnam betasatellite</i>  | TYLCVNB-[VN-Han-05]         | DQ641714 |
| <i>Lindernia anagallis yellow vein betasatellite</i>  | LaYVB                       | DQ641715 |
| <i>Alternanthera yellow vein betasatellite</i>        | AlYVB-[VN-Hue-05]           | DQ641716 |
| <i>Cotton leaf curl Gezira betasatellite</i>          | CLCuGeB-[SD-Dat-06]         | DQ644564 |
| <i>Radish leaf curl betasatellite</i>                 | RaLCuB                      | EF175734 |
| <i>Ludwigia leaf distortion betasatellite 2</i>       | LuLDB2                      | EF614160 |
| <i>Cotton leaf curl Bahraich betasatellite</i>        | CLCBahB                     | EF620566 |
| <i>Sida yellow vein Barrackpore betasatellite</i>     | SiYVBaB                     | EU188921 |
| <i>Tomato leaf curl Bangalore betasatellite 2</i>     | ToLCuBaB2                   | EU280314 |
| <i>Tomato leaf curl Patna betasatellite</i>           | ToLCPaB-[IN-Pat-07]         | EU862324 |
| <i>Emilia yellow vein betasatellite</i>               | EmYVB                       | FJ869906 |
| <i>Ageratum leaf curl Cameroon betasatellite</i>      | ALCuCMB-[CM-Man-AMBF-06]    | FM164737 |
| <i>Vernonia yellow vein betasatellite</i>             | VYVB-[IN-Mad-09]            | FN435836 |
| <i>Kenaf leaf curl betasatellite</i>                  | KeLCuB                      | FN678779 |
| <i>Malvastrum yellow vein Yunnan betasatellite 2</i>  | MaYVYnB1                    | FN806780 |
| <i>Ageratum leaf curl Buea betasatellite</i>          | ALCuBB-[CM-LIO1-SatB33-09]  | FR717140 |
| <i>Leucas zeylanica yellow vein betasatellite</i>     | LzYVB                       | GQ421324 |
| <i>Rose leaf curl betasatellite</i>                   | RoLCuB-[PK-Fai-06]          | GQ478344 |
| <i>Tomato leaf curl Ranchi betasatellite</i>          | ToLCuRaB                    | GQ994096 |
| <i>Okra leaf curl betasatellite</i>                   | OLCuB                       | GU111963 |
| <i>Chili leaf curl Jaunpur betasatellite</i>          | ChLCuJB-[IN-Jau-07]         | HM007103 |
| <i>Papaya leaf curl India betasatellite</i>           | PaLCuINA-[India-Panipat-08] | HM143906 |
| <i>Tomato leaf curl Panipat betasatellite</i>         | ToLCuPaB                    | HM143907 |
| <i>Tobacco leaf curl Patna betasatellite</i>          | TobLCuPatB-[IN-Pusa-09]     | HQ180394 |
| <i>Tomato leaf curl Togo betasatellite</i>            | ToLCuTGB                    | HQ586965 |
| <i>Siegesbeckia yellow vein betasatellite 2</i>       | SiYVB2                      | JF682839 |

|                                                         |                             |          |
|---------------------------------------------------------|-----------------------------|----------|
| <i>Vernonia yellow vein Fujian betasatellite</i>        | VYVFuB-[CN-09]              | JF733779 |
| <i>Tomato leaf curl Yemen betasatellite</i>             | ToLCYEB-[YE-tob56-89]       | JF919717 |
| <i>Chili leaf curl Sri Lanka betasatellite</i>          | ChLCuSLB-[SL-Mih-09]        | JN638445 |
| <i>Tomato leaf curl India betasatellite</i>             | ToLCuINB                    | JQ012916 |
| <i>French bean leaf curl betasatellite</i>              | FBLCuB-[IN-Kan-11]          | JQ866298 |
| <i>Tobacco leaf chlorosis betasatellite</i>             | TobLCB                      | JX025223 |
| <i>Tomato leaf curl Hajipur betasatellite</i>           | ToLCuHaB                    | JX262390 |
| <i>Mungbean yellow mosaic betasatellite</i>             | MYMB-[IN-Cowpea-12]         | JX443646 |
| <i>Tomato leaf curl Java virus betasatellite</i>        | ToLCJaB-[NP-R7-Papaya-2010] | KC282642 |
| <i>Tobacco leaf curl Yunnan betasatellite</i>           | TobLCuYnB                   | KC699042 |
| <i>Tomato leaf curl Gandhinagar betasatellite</i>       | ToLCGanB-[IN-pToGNbH14-12]  | KC952006 |
| <i>Andrographis yellow vein leaf curl betasatellite</i> | AnYVLCuB-[IN-Luc-10]        | KC967282 |
| <i>Okra leaf curl Oman betasatellite</i>                | OLCuOMB-[OM-Barka-12]       | KF267444 |
| <i>Siegesbeckia yellow vein betasatellite</i>           | SiYVB-[CN-FZ02-12]          | KF499590 |
| <i>Tomato yellow leaf curl Yunnan betasatellite</i>     | ToYLCYnB-[CN-tob-]          | KF640694 |
| <i>Hedyotis yellow mosaic betasatellite</i>             | HYMB-[VN-BinhDinh-13]       | KF641186 |
| <i>Cotton leaf curl Bangalore betasatellite 2</i>       | CLCuBaB2                    | KF964654 |
| <i>Sida yellow vein Vietnam betasatellite 2</i>         | SiYVVB2                     | KF990602 |
| <i>Papaya leaf curl China betasatellite</i>             | PaLCuCNB-[CN-Hainan-14]     | KJ642219 |
| <i>Tomato leaf curl Malaysia betasatellite</i>          | ToLCMYB-[MY-13]             | KM051528 |
| <i>Malvastrum yellow vein Cambodia betasatellite</i>    | MaYVKHB                     | KP188832 |
| <i>Tomato yellow leaf curl Shandong betasatellite</i>   | ToYLCShB-[CN-SDSG-14]       | KP322555 |
| <i>Rhynchosia yellow mosaic betasatellite</i>           | RhYMB-[IN-Pha-14]           | KP752092 |
| <i>Papaya leaf curl Gandhinagar betasatellite</i>       | PaLCGB                      | KT253638 |
| <i>Tomato leaf curl Ghana betasatellite 1</i>           | ToLCuGHB1                   | KT382328 |
| <i>Tomato leaf curl Ghana betasatellite 2</i>           | ToLCuGHB2                   | KT382329 |
| <i>Ludwigia leaf distortion betasatellite 3</i>         | LuLDB3                      | KT390358 |
| <i>Momordica yellow mosaic betasatellite</i>            | MamYMB-[BJ-57-14-14]        | KT454829 |
| <i>Tomato leaf curl betasatellite 2</i>                 | ToLCuB2                     | KU500806 |
| <i>Vernonia crinkle betasatellite</i>                   | VeCrB                       | KX831134 |
| <i>Pea leaf distortion betasatellite</i>                | PeLDB                       | KY001644 |
| <i>Cotton leaf curl Bangalore betasatellite 3</i>       | CLCuBaB3                    | LC316186 |
| <i>Mirabilis leaf curl betasatellite</i>                | MiLCuB-[IN-Him-13]          | LK054803 |
| <i>Cotton leaf curl Kashmir betasatellite</i>           | CLCuKaB                     | LN610993 |
| <i>Tomato leaf curl Pakistan betasatellite</i>          | ToLCuPKB                    | LN811050 |
| <i>Tobacco leaf curl Sheikhpura betasatellite</i>       | TobLCuShB                   | LT795119 |
| <i>Cotton leaf curl Tandojam betasatellite</i>          | CLCuTaB                     | LT827054 |
| <i>Hibiscus vein enation betasatellite</i>              | HVEB                        | MF140456 |
| <i>Codiaeum leaf curl betasatellite</i>                 | CoLCuB                      | MF278784 |
| <i>Tomato leaf curl Lucknow betasatellite</i>           | ToLCuLuB                    | MG478451 |
| <i>Tomato leaf curl Joydebpur betasatellite 2</i>       | ToLCuJoB2                   | MG571522 |
| <i>Tomato leaf curl Karnataka betasatellite</i>         | ToLCuKaB                    | MG758146 |
| <i>Cotton leaf curl Bangalore betasatellite 4</i>       | CLCuBaB4                    | MG758149 |

|                                                    |          |          |
|----------------------------------------------------|----------|----------|
| <i>Emilia yellow vein Fujian betasatellite</i>     | EmYVFuB  | MH035671 |
| <i>Tomato leaf curl Bundi betasatellite</i>        | ToLCuBuB | MH577020 |
| <i>Cotton leaf curl Burkina Faso betasatellite</i> | CLCuBFB  | MK032307 |
| <i>Papaya leaf curl India betasatellite 2</i>      | PaLCINB2 | MN529627 |
